# Supplementary material for: Influence of Sr doping on the photoelectronic properties of CsPbX3 (X = Cl, Br, or I): a DFT investigation
Source: Royal Society of Chemistry journal article supplement (doi:10.1039/d2cp05867g), 2023-01-01
Supplement: d2cp05867g1.pdf [file d2cp05867g1.pdf]

1 **Supporting information for**  
2 **“Influence of Sr doping on the photoelectronic properties of CsPbX<sub>3</sub>**  
3 **(X=Cl, Br, or I): A DFT investigation”**

4 Man Zhang<sup>a</sup>, Guangbiao Xiang<sup>a</sup>, Yanwen Wu<sup>a</sup>, Jing Liu<sup>a</sup>, Jiancai Leng<sup>b\*</sup>, Chen  
5 Cheng<sup>a\*</sup>, Hong Ma<sup>a\*</sup>

6 <sup>a</sup> Shandong Provincial Key Laboratory of Optics and Photonic Device and Collaborative Innovation  
7 Center of Light Manipulations and Applications, School of Physics and Electronics, Shandong  
8 Normal University, Jinan 250014, China;

9 <sup>b</sup> School of Electronic and Information Engineering (Department of Physics), Qilu University of  
10 Technology (Shandong Academy of Sciences), Jinan 250353, China

11  
12 Corresponding author: [jiancaileng@qlu.edu.cn](mailto:jiancaileng@qlu.edu.cn); [drccheng@sdnu.edu.cn](mailto:drccheng@sdnu.edu.cn); [mahong@sdnu.edu.cn](mailto:mahong@sdnu.edu.cn)

13  
14  
15 **Table S1.** Relating to the energy of formation, the enthalpy of formation of various  
16 compounds.

| formula                                                  | Space group | The formation energy (eV) | formula                                                   | Space group | The formation energy (eV) | formula                                                   | Space group | The formation energy (eV) |
|----------------------------------------------------------|-------------|---------------------------|-----------------------------------------------------------|-------------|---------------------------|-----------------------------------------------------------|-------------|---------------------------|
| CsI                                                      | P4/mbm      | -5.411                    | CsBr                                                      | Pm-3m       | -6.022                    | CsCl                                                      | Pm-3m       | -6.538                    |
| PbI <sub>2</sub>                                         | P-3m1       | -8.147                    | PbBr <sub>2</sub>                                         | Pnam        | -9.673                    | PbCl <sub>2</sub>                                         | P42/mnm     | -10.764                   |
| SrI <sub>2</sub>                                         | pnma        | -9.815                    | SrBr <sub>2</sub>                                         | P4/n2       | -11.325                   | SrCl <sub>2</sub>                                         | Fm-3m       | -12.792                   |
| CsPbI <sub>3</sub>                                       | Pm-3m       | -14.087                   | CsPbBr <sub>3</sub>                                       | Pm-3m       | -15.940                   | CsPbCl <sub>3</sub>                                       | Pm-3m       | -17.624                   |
| CsPb <sub>0.875</sub> Sr <sub>0.125</sub> I <sub>3</sub> | Pm-3m       | -14.225                   | CsPb <sub>0.875</sub> Sr <sub>0.125</sub> Br <sub>3</sub> | Pm-3m       | -16.128                   | CsPb <sub>0.875</sub> Sr <sub>0.125</sub> Cl <sub>3</sub> | Pm-3m       | -17.849                   |

17

18

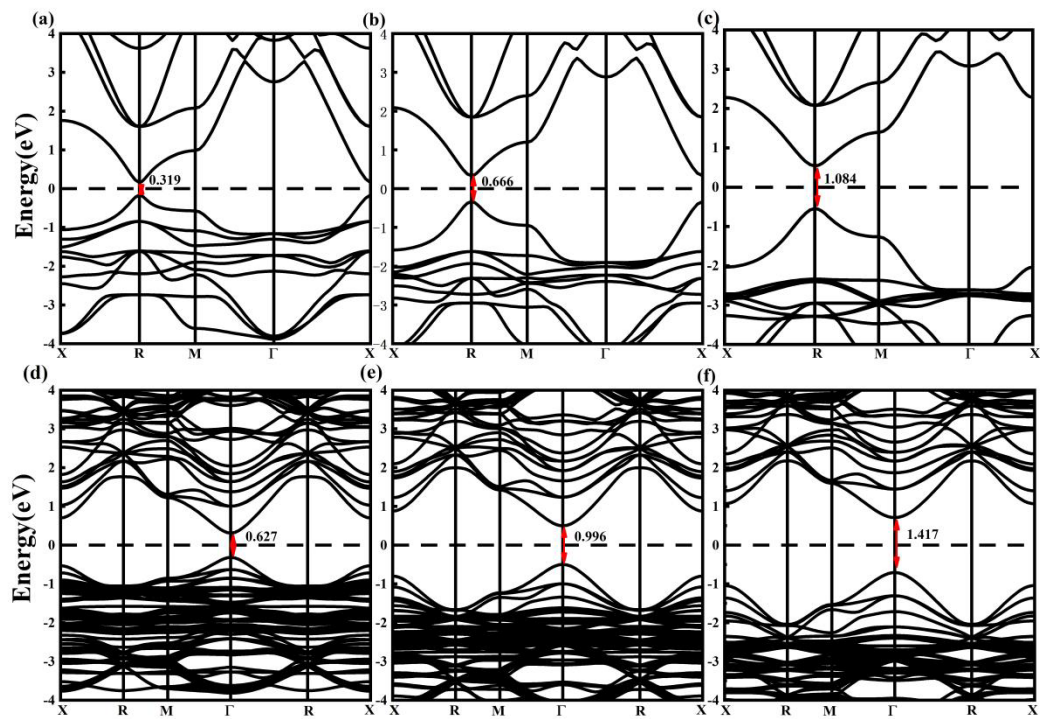

20

21 **Fig S1.** Energy band calculation with spin-orbit coupling, **(a)** CsPbI<sub>3</sub>, **(b)** CsPbBr<sub>3</sub>, **(c)**22 CsPbCl<sub>3</sub>, **(d)** CsPb<sub>0.875</sub>Sr<sub>0.125</sub>I<sub>3</sub>, **(e)** CsPb<sub>0.875</sub>Sr<sub>0.125</sub>Br<sub>3</sub>, and **(f)** CsPb<sub>0.875</sub>Sr<sub>0.125</sub>Cl<sub>3</sub>.

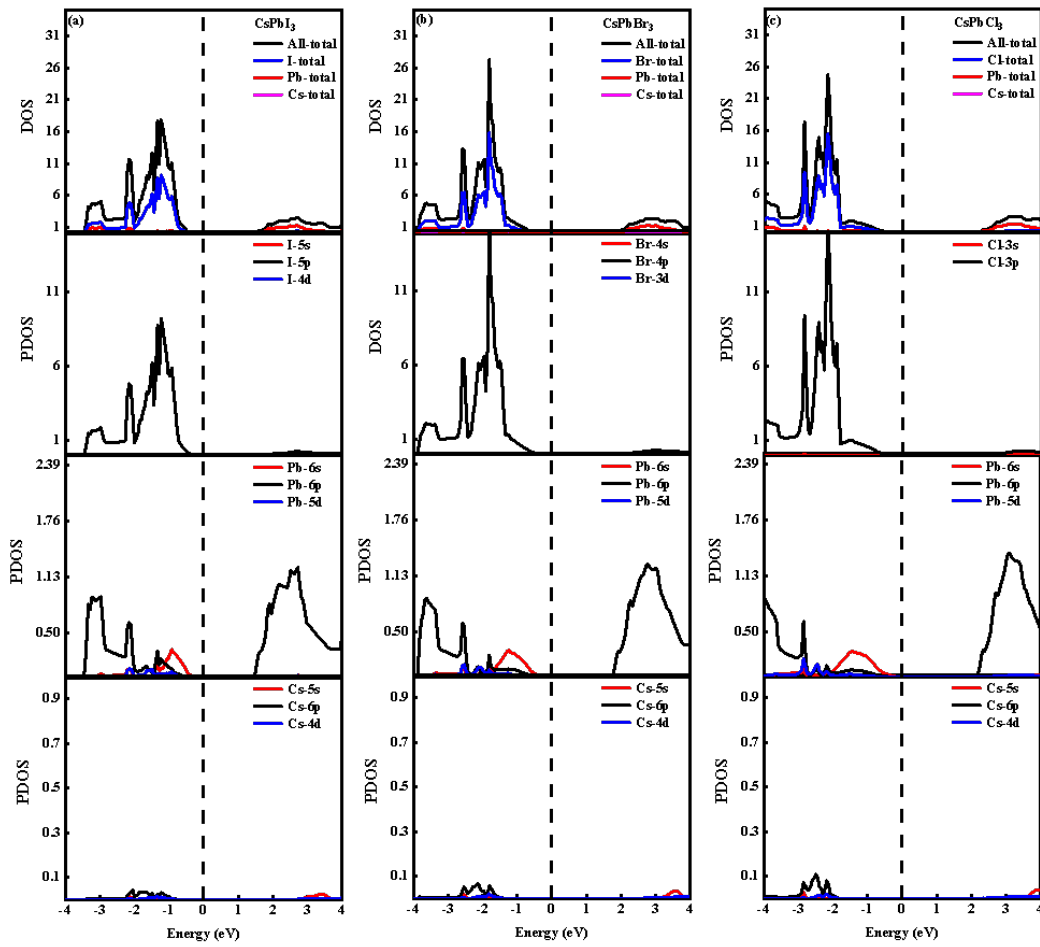

23

24

25 **Fig S2.** Density distribution of (a) CsPbI<sub>3</sub> (b) CsPbBr<sub>3</sub>, and (c) CsPbCl<sub>3</sub>

26

27
